# Supplementary material
Source: PubMed Central journal article supplement (PMC5698877)

## Supporting Information

### **Red clover aryl hydrocarbon receptor (AhR) and estrogen receptor (ER) agonists enhance estrogen genotoxic metabolism**

*Tareisha L. Dunlap,<sup>†</sup> Caitlin E. Howell,<sup>†</sup> Nita Mukand, Shao-Nong Chen, Guido F. Pauli, Birgit M. Dietz,  
and Judy L. Bolton\**

UIC/NIH Center for Botanical Dietary Supplements Research, Department of Medicinal Chemistry and  
Pharmacognosy, College of Pharmacy, University of Illinois at Chicago, 833 S. Wood Street, Chicago,  
Illinois 60612-7231, USA

Correspondence: \*Dr. Judy L. Bolton, Department of Medicinal Chemistry and Pharmacognosy,  
University of Illinois at Chicago, 833 S. Wood Street, M/C 781, Chicago, IL, 60612-7231; Email:  
Judy.Bolton@uic.edu, Phone: 312-996-5280, Fax: 312-996-7107

<sup>†</sup>These authors contributed equally.

## Figure Legends

### **Figure S1. LC-MS/MS analysis of methoxyestrone metabolites (2-MeOE<sub>1</sub>, 4-MeOE<sub>1</sub>) in MCF-10A**

**cells.** A) Cells were treated with RC (10 µg/mL) and compounds, GN, DZ, BA, FN (10 µM) for 48 h and then 24 h with E<sub>2</sub> (1 µM).

### **Figure S2. TCDD-induced XRE-luciferase reporter activity in HC-04 and MCF-7 cells.**

A) XRE-luciferase reporter activity was analyzed after 24 h treatment with TCDD (10 nM) in HC-04 cells and MCF-7 cells. Results were analyzed by t-test to compare TCDD treatment to DMSO treatment, \*p < 0.05.

### **Figure S3. LC-MS/MS analysis of TCDD-induced methoxy ether metabolites (2-MeOE<sub>1</sub>, 4-MeOE<sub>1</sub>)**

**and CYP1A1/1B1 expression in MCF-10A and MCF-7 cells.** Levels of 2-MeOE<sub>1</sub> and 4-MeOE<sub>1</sub> metabolites from A) MCF-10A and B) MCF-7 cells were analyzed by LC-MS/MS after 48 h treatment with TCDD (10 nM) then 24 h with E<sub>2</sub> (1 µM). CYP1A1 and CYP1B1 expression levels were determined after 24 h treatment with TCDD (10 nM) in C) MCF-10A and D) MCF-7 cells by RT-qPCR analysis. Results were analyzed by t-test to compare TCDD treatment to DMSO treatment, \*p < 0.05.

**Figure S4. CYP1A1/1B1 expression levels in MCF-7 cells after treatment with E<sub>2</sub>.** A) Cells were treated with E<sub>2</sub> (1 nM, 1 µM) for 24 h before RT-qPCR analysis of CYP1A1 and B) CYP1B1 levels.

**Figure S5. CYP1A1 and CYP1B1 expression levels in MCF-7 cells after cotreatment with isoflavones and E<sub>2</sub>.** RT-qPCR analysis of A) CYP1A1 and B) CYP1B1 expression levels after 24 h cotreatment of MCF-7 cells with isoflavones (10 µM) and E<sub>2</sub> (1 nM) and C) CYP1A1 and D) CYP1B1 expression levels were determined after 24 h cotreatment of MCF-7 cells with isoflavones (10 µM) and E<sub>2</sub> (1 µM).

1    Figure S1

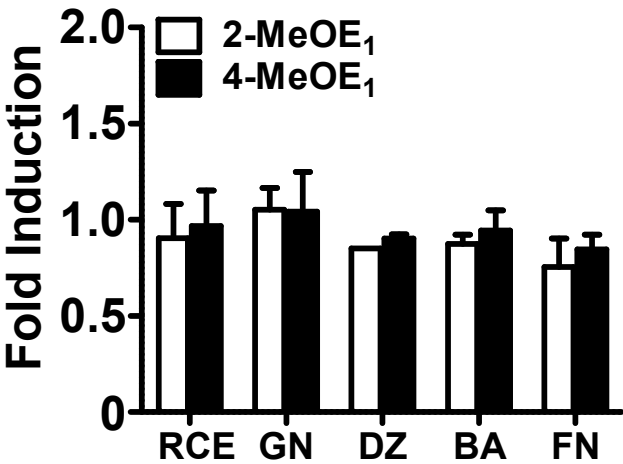

2

1    Figure S2

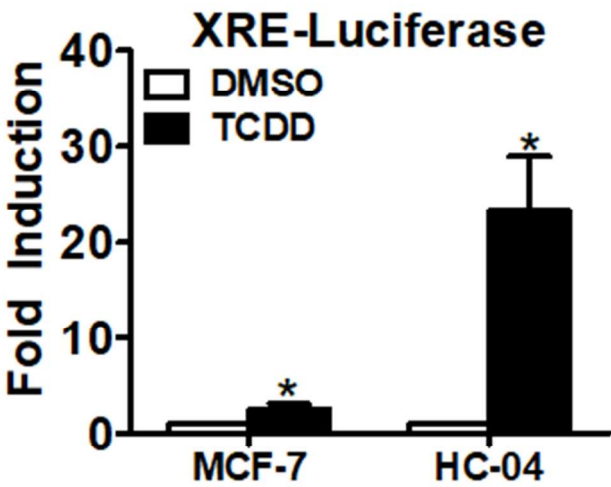

2

3

1 Figure S3

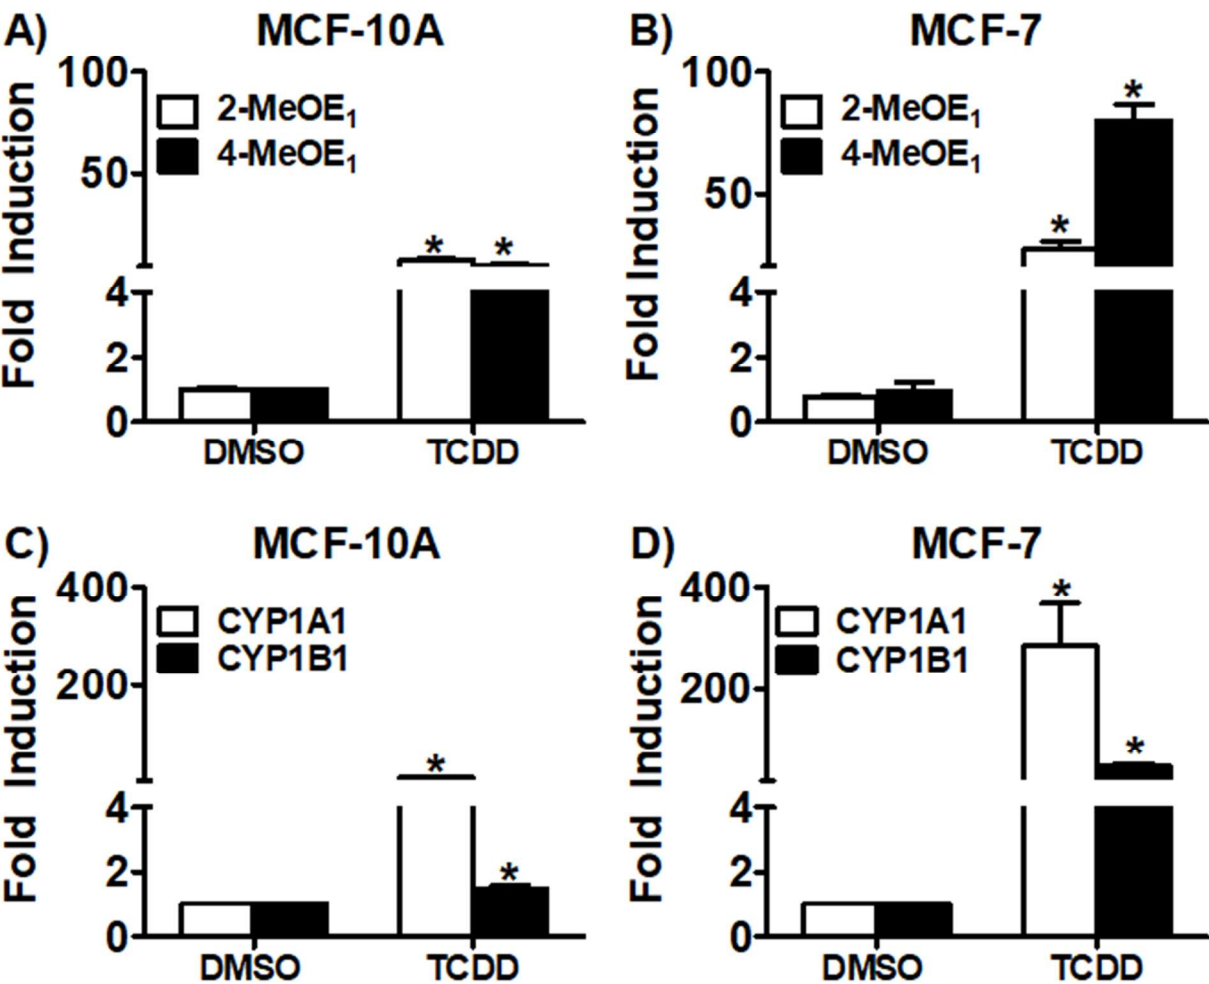

2  
3  
4  
5  
6  
7  
8  
9

1    **Figure S4**

2  
3  
4  
5  
6  
7  
8  
9  
10  
11  
12  
13  
14  
15

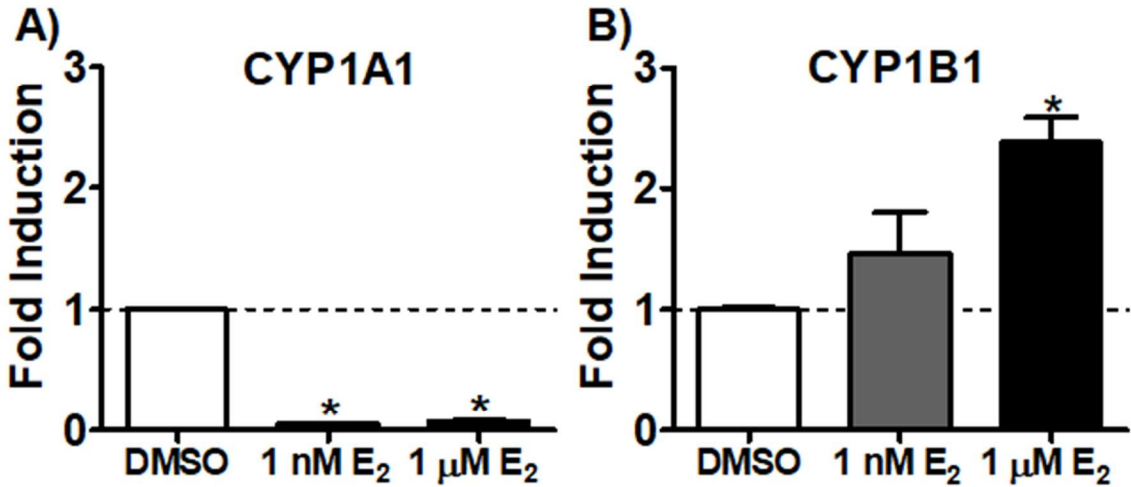

1 Figure S5

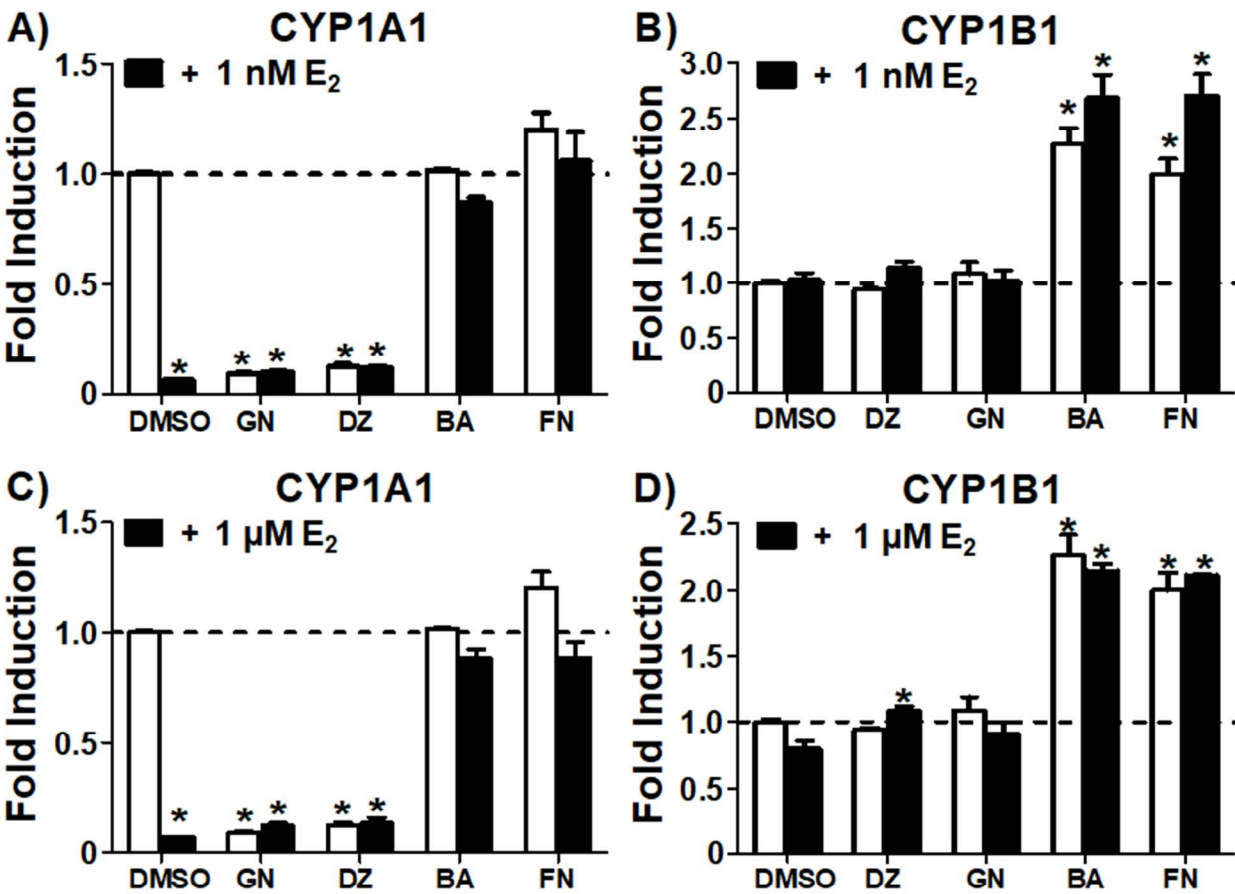

Supplement: tx7b00237_si_001.pdf [file tx7b00237_si_001.pdf]
